# Supplementary material for: Rapid Identification of Drug-Resistant Tuberculosis Genes Using Direct PCR Amplification and Oxford Nanopore Technology Sequencing
Source: Can J Infect Dis Med Microbiol. 2022 Mar 28;2022:7588033. doi: 10.1155/2022/7588033 (PMC8979720; doi:10.1155/2022/7588033)
Supplement: Supplementary Materials — Supplementary Material 1: Details of the 20 Mycobacterium tuberculosis specimens. Supplementary Material 2: Summary of quality statistics of multiplexed trim sequencing data. Supplementary Material 3: Targeted mutations identified by nanopore sequencing of 20 Mycobacterium tuberculosis specimens. Supplementary Material 4: Sanger sequencing data for 20 Mycobacterium tuberculosis specimens. Supplementary Material 5: MIC diagnostic performance of 20 Mycobacterium tuberculosis specimens. [file 7588033.f1.zip]

Archive with 5 entries (5 files):
- 7588033.f1/Supplementary Material 1.Details of the 20 Mycobacterium tuberculosis specimens.docx
- 7588033.f1/Supplementary Material 2.Summary of quality statistics of multiplexed trim sequencing data (1).docx
- 7588033.f1/Supplementary Material 3.Targeted mutations identified by nanopore of 20 Mycobacterium tuberculosis specimens.docx
- 7588033.f1/Supplementary Material 4. Sanger sequencing data for 20 Mycobacterium tuberculosis specimens. .docx
- 7588033.f1/Supplementary Material 5.MIC diagnostic performance of 20 Mycobacterium tuberculosis specimens.docx
